# Supplementary material for: Y2H-SCORES: A statistical framework to infer protein-protein interactions from next-generation yeast-two-hybrid sequence data
Source: bioRxiv or medRxiv preprint supplement (doi:10.1101/2020.09.08.288365), 2020-09-14
Supplement: Supplementary file [file media-1.pdf]

**Median-of-ratios normalization**

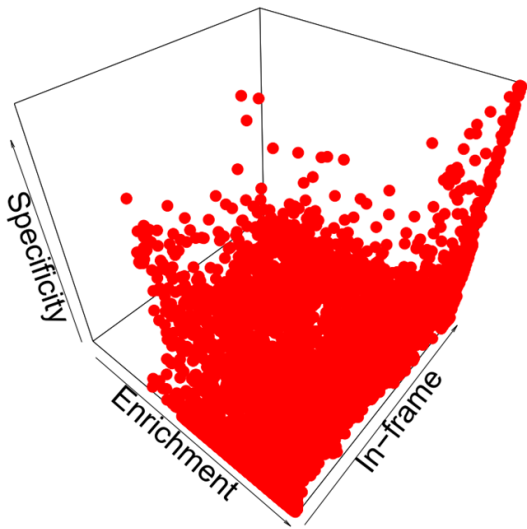

**TPM normalization**

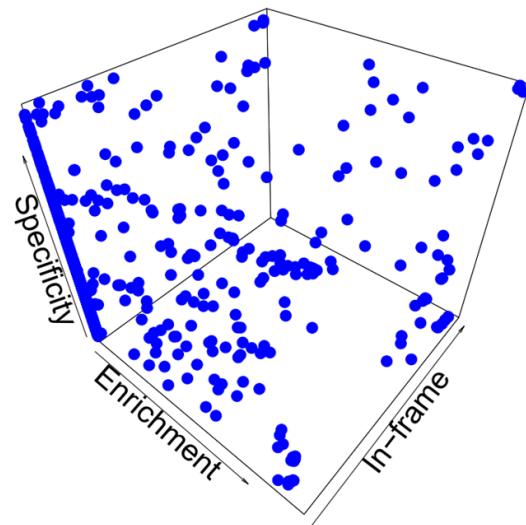

**Library size normalization**

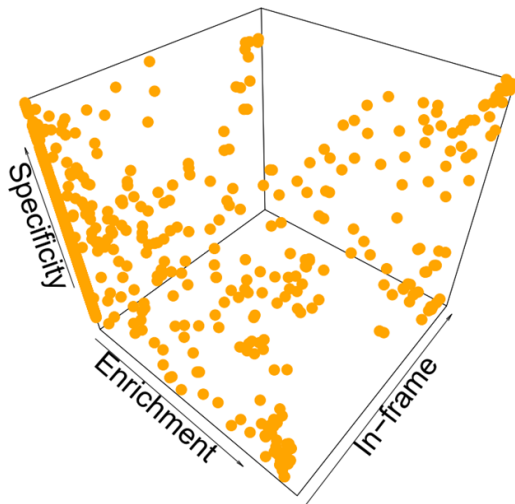

**RUV normalization**

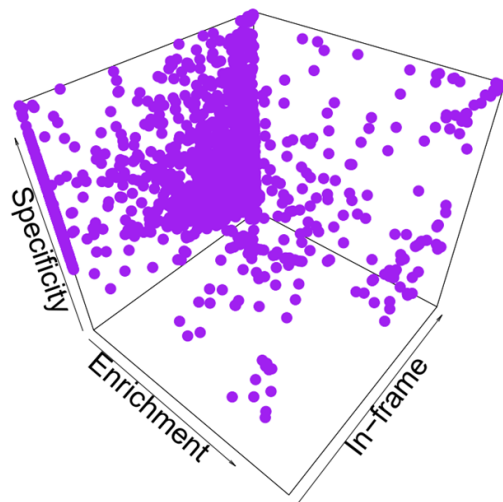

S2 Fig. Top candidate interactors inferred with Y2H-SCORES and different normalization methods. Only top 5% Borda score values are shown.

Velásquez-Zapata et. al. (2020) Y2H-SCORES: A statistical framework to infer protein-protein interactions from next-generation yeast-two-hybrid sequence data.
