# Supplementary material for: Y2H-SCORES: A statistical framework to infer protein-protein interactions from next-generation yeast-two-hybrid sequence data
Source: bioRxiv or medRxiv preprint supplement (doi:10.1101/2020.09.08.288365), 2020-09-14
Supplement: Supplementary file [file media-7.pdf]

Y2H-SCORES: A statistical framework to infer protein-protein interactions from next-generation yeast-two-hybrid sequencing data

Valeria Velásquez-Zapata, J. Mitch Elmore, Sagnik Banerjee, Karin S. Dorman, Roger P. Wise

S1 Text. *HvThf1* prey sequences.

*HvThf1* prey fragment

GACAGGGATGCCATCTTCAAGTCATATGTAACGGCGTTAAATGAAGATCCTGAGCAATACA  
GGGCTGATGCACAAAGGATGGAAGAGTGGGCACGCTCACAAAATGGTAATCTGTTAGTTG  
AATTTTCTTCCAGAGATGGGGAAATAGAGTCCATTCTGAAAGATATATCAGAAAGGGCCCA  
GGGTAAGGGAAACTTCAGCTACAGCCGGTCTTTGCTGTTGGCTTGTCCGTTTGCTTGAG  
CTCTCAAATGCGACGGAGCCAACCGTACTGGACAAGCTTTGCGCTGCTCTAAACATCAATA  
AAAAAAGCGTGGATAGAGACCTTGACGTTTACCGCAACTTACTGTGCGAAATTGGTTCAAGC  
CAAGGA ACTTCTTAAGGAATACGTCGAGAGGGAAAAGAAGAAGAGAGCAGAGAGATTGGA  
GACGCCCAAGCCGAACGAGGCTGTTGCAAATTCGATGGAAGCACTTATCCCTTGAAGCA  
TTAACTCAACCTTTCCCCAGAGGAGAGCTTGTCGGATAACAGATATTAACAGTTATACATC  
TGGATAGCGTTGAGAACTATCGGGGGCATCTTTGGCTGCTCTTTGCGTGGTGTAGTACTCG  
GCGGTACAAAAAGATCCAGATTATTCGCAGTAGTTGGTATTTTGTAAATTTCTCCTTCTCTGT  
GTTCGAATGTACCGTTTTCTTCACTTCGTTGACAATATATGAAGAGTTATCTGGTGGTGAAT  
GTTACTCACAAGATGAGAAATCATATATTTTGGTGAAAAGAAGTCATTCTGACTGGTGCTG  
TTAAAAAAAAAAAAAAAAAAAAA

HvTHF1 protein translation

DRDAIFKSYVTALNEDPEQYRADAQRMEEWARSQNGNLLVEFSSRDGEIESILKDISERAQ GK  
GNFSYSRFFAVGLFRLLELSNATEPTVLDKLCAALNINKKSVDRDL DVYRNLLSKLVQAKELLKE  
YVEREKKKRAERLETPKPNEAVAKFDGSTYPLKH
